# Supplementary material for: There is Always a Way: Organizing VR User Tests with Remote and Hybrid Setups during a Pandemic—Learnings from Five Case Studies
Source: MDPI journal article supplement (doi:10.3390/mti5100062), 2021-10-11
Supplement: s1 [file s1]

Archive with 3 entries (3 files):
- supplementary1.pdf
- supplementary2.pdf
- supplementary3.pdf
