# Supplementary material for: There is Always a Way: Organizing VR User Tests with Remote and Hybrid Setups during a Pandemic—Learnings from Five Case Studies
Source: MDPI journal article supplement (doi:10.3390/mti5100062), 2021-10-11
Supplement: s1 [file s1 › supplementary1.pdf]

# **ON-SITE SAFETY AND HYGIENIC PROCEDURES FOR VR USER TESTING**

---

## ON-SITE FACILITATOR

Before

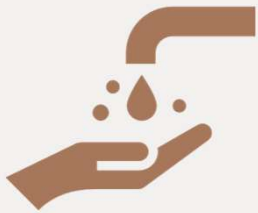

Wash hand and  
disinfect

During

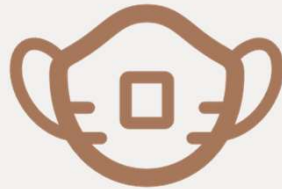

FFP2 Mask

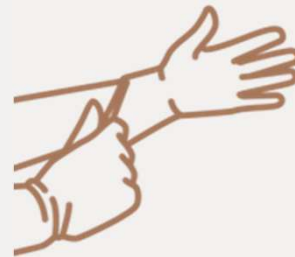

Gloves

After

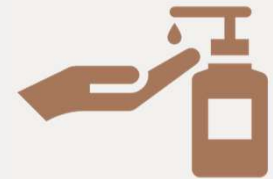

Wash hand and  
disinfect

## ON-SITE PARTICIPANT

Before

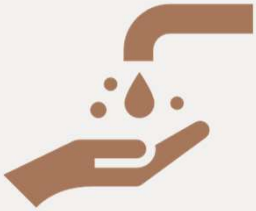

Wash hand and  
disinfect

During

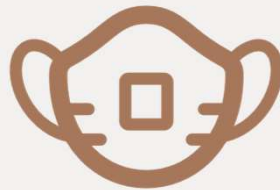

Mask

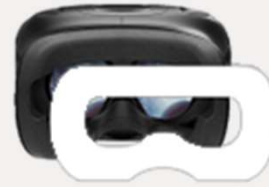

VR headset  
protection mask

After

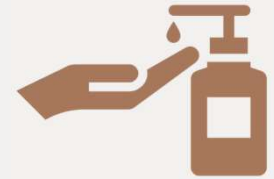

Wash hand and  
disinfect

## ON-SITE PERSONNEL

(participant, facilitator, assistant, observer, etc.)

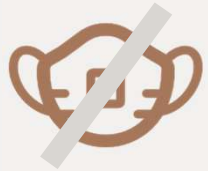

Mask

OR

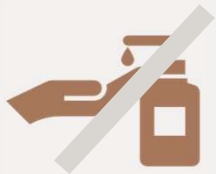

Disinfectant

OR

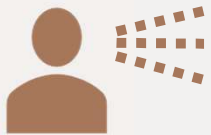

Any flu symptoms

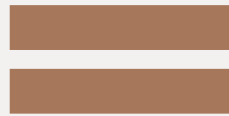

**CANNOT  
ENTER!**

## ROOM SET-UP

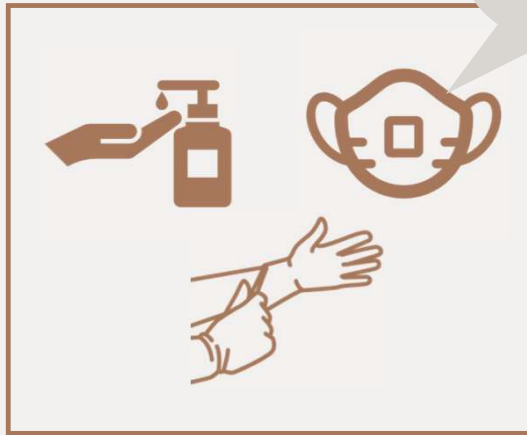

FFP2  
mask

Hygiene table in front

VENTILATION IN  
BETWEEN

At least 1 – 1.5 hours  
break in between

## SAFETY DISTANCE IN EACH ROOM

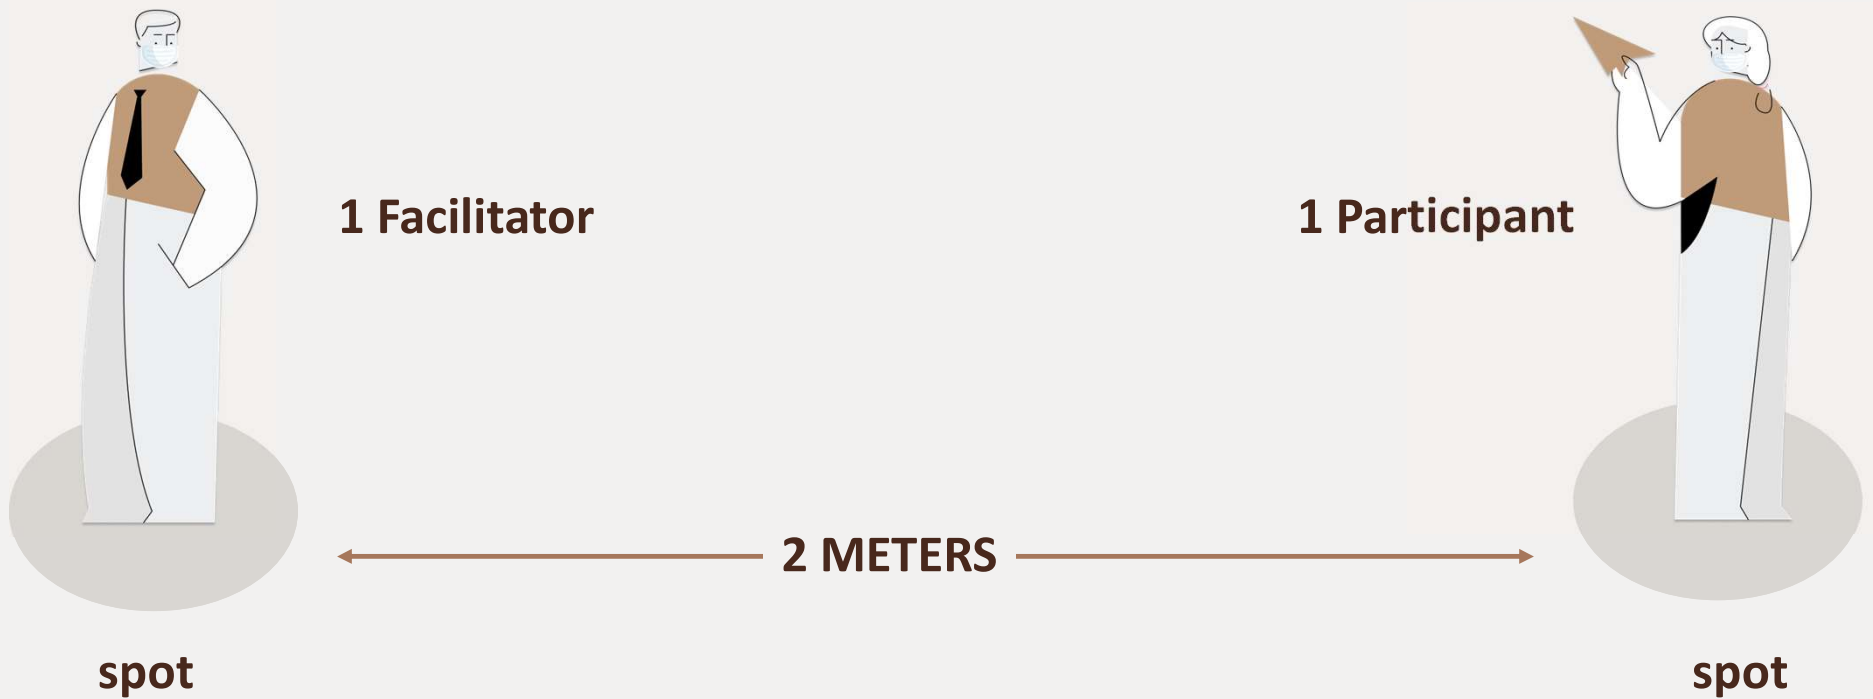

## SAFETY DISTANCE IN EACH ROOM

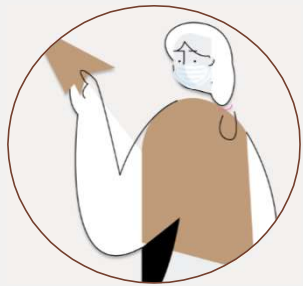

On-site  
participant

Put on  
VR headset + controllers

**THEMSELVES**

← 2m →

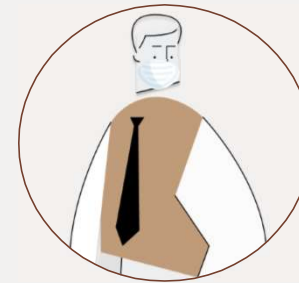

On-site  
facilitator

ONLY approach in case of  
emergency:

- Participant feels dizzy or in the risk of falling

## DEVICE SANITIZATION

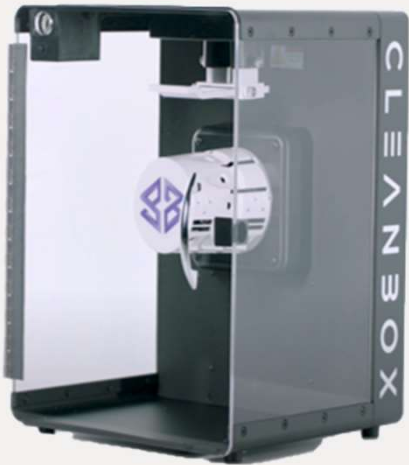

Alcohol wipe

Disinfect before  
and after use

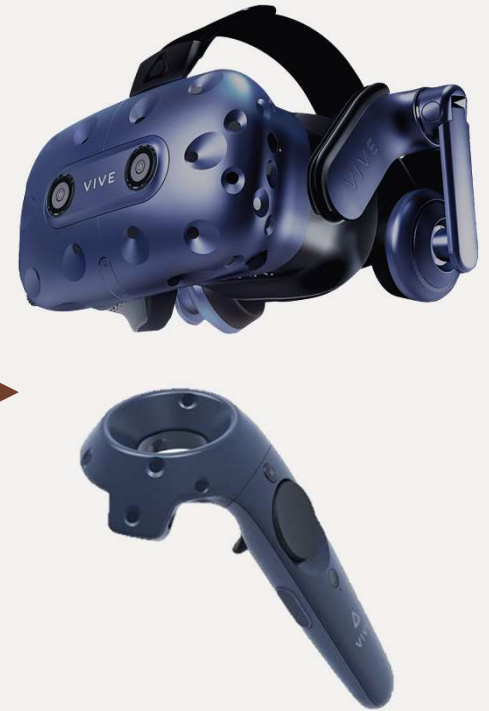

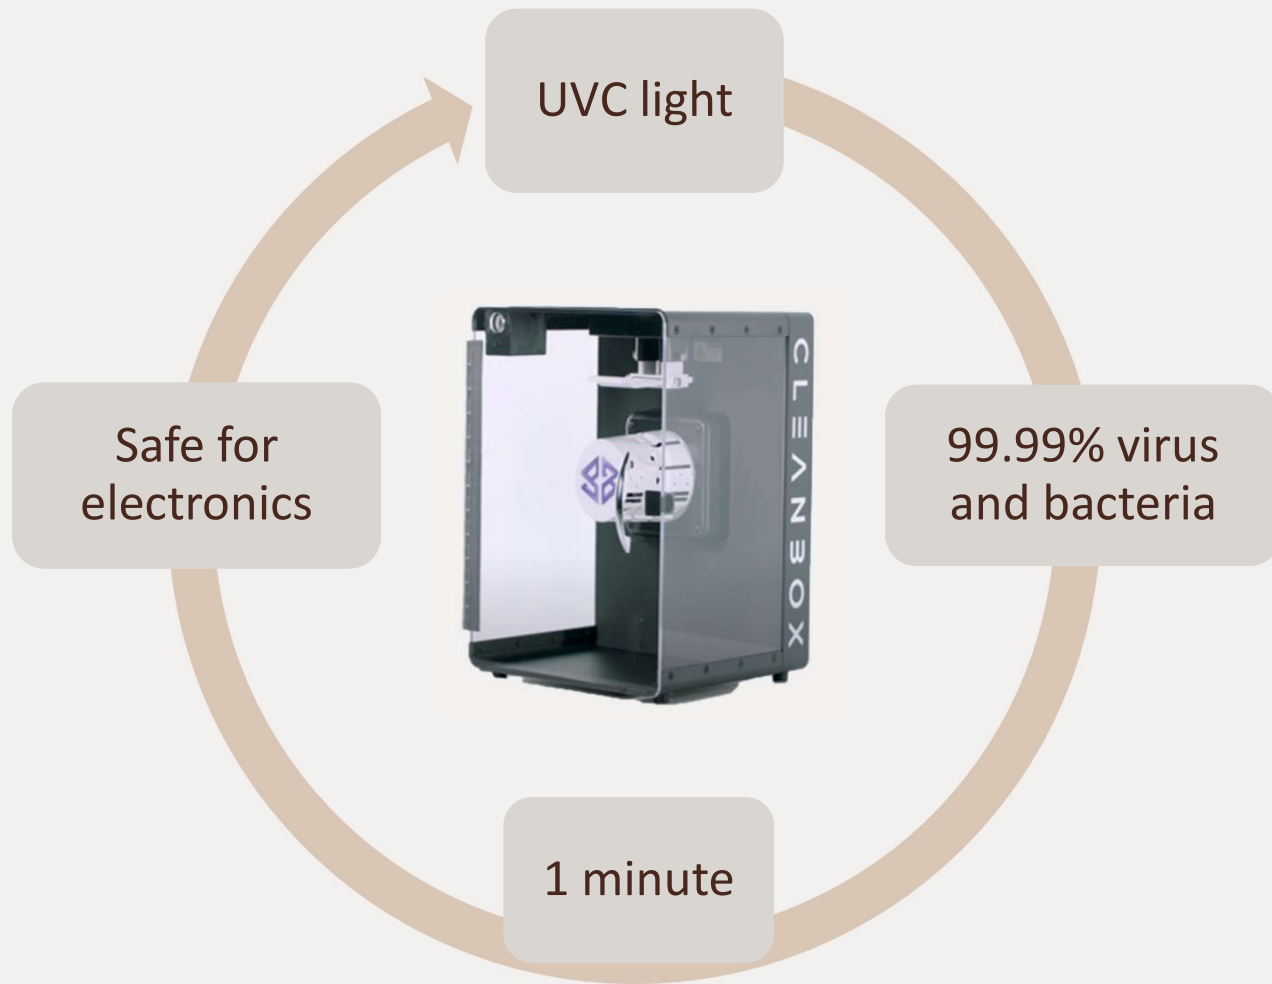

**THE END**
